# Supplementary material for: A Phase II Study of FOLFIRI Plus Ziv-Aflibercept After Trifluridine/Tipiracil Plus Bevacizumab in Patients with Metastatic Colorectal Cancer: WJOG 11018G
Source: Springer Nature journal article supplement (doi:10.1007/s11523-024-01043-2), 2024-03-01
Supplement: MOESM1 [file 26809280]

## Supplementary file

Supplemental Table 1, Supplemental Figure 1

**Title:** A phase II study of FOLFIRI plus ziv-aflibercept after trifluridine/tipiracil plus bevacizumab in patients with metastatic colorectal cancer: WJOG 11018G

**Authors:** Toshihiko Matsumoto<sup>1</sup>, Yoshiyuki Yamamoto<sup>2</sup>, Masahito Kotaka<sup>3</sup>, Toshiki Masuishi<sup>4</sup>, Yasushi Tsuji<sup>5</sup>, Hirokazu Shoji<sup>6</sup>, Kenro Hirata<sup>7</sup>, Takao Tsuduki<sup>8</sup>, Akitaka Makiyama<sup>9</sup>, Naoki Izawa<sup>10</sup>, Naoki Takahashi<sup>11</sup>, Masahiro Tsuda<sup>12</sup>, Hisateru Yasui<sup>13</sup>, Takashi Ohta<sup>14</sup>, Yosuke Kito<sup>15</sup>, Satoshi Otsu<sup>16</sup>, Shuichi Hironaka<sup>16,17</sup>, Kentaro Yamazaki<sup>18</sup>, Narikazu Boku<sup>19</sup>, Ichinosuke Hyodo<sup>20</sup>, Kenichi Yoshimura<sup>21</sup>, Kei Muro<sup>4</sup>

## Affiliations

1. Cancer Treatment Center, Kansai Medical University Hospital, Hirakata-shi, Osaka, Japan
2. Department of Gastroenterology, Faculty of Medicine, University of Tsukuba, Tsukuba-shi, Ibaragi, Japan
3. Gastrointestinal Cancer Center, Sano Hospital, Kobe-shi, Hyogo, Japan
4. Department of Clinical Oncology, Aichi Cancer Center Hospital, Nagoya-shi, Aichi, Japan
5. Department of Clinical Oncology, Tonan Hospital, Sapporo-shi, Hokkaido, Japan
6. Department of Gastrointestinal Medical Oncology, National Cancer Center Hospital, Chuo-ku, Tokyo, Japan
7. Division of Gastroenterology and Hepatology, Department of Internal Medicine, School of Medicine, Keio University, Tokyo, Japan
8. Department of Internal Medicine, Himeji Red Cross Hospital, Himeji-shi, Hyogo, Japan
9. Cancer Center, Gifu University Hospital, Gifu-shi, Gifu, Japan
10. Department of Clinical Oncology, St. Marianna University School of Medicine, Kawasaki-shi, Kanagawa, Japan
11. Department of Gastroenterology, Saitama Cancer Center Hospital, Kita-adachi-gun, Saitama, Japan
12. Department of Gastroenterological Oncology, Hyogo Cancer Center, Akashi-shi, Hyogo, Japan
13. Department of Clinical Oncology, Kobe City Medical Center General Hospital, Kobe-shi, Hyogo, Japan

14. Department of Clinical Oncology, Kansai Rosai Hospital, Amagasaki-shi, Hyogo, Japan
15. Department of Medical Oncology, Ishikawa Prefectural Central Hospital, Kanazawa-shi, Ishikawa, Japan
16. Department of Medical Oncology and Hematology, Oita University Faculty of Medicine, Yufu-shi, Oita, Japan
17. Department of Medical Oncology, Kyorin University Faculty of Medicine, Mitaka-shi, Tokyo, Japan
18. Division of Gastrointestinal Oncology, Shizuoka Cancer Center, Sunto-gun, Shizuoka, Japan.
19. Department of Oncology and General Medicine, Institute of Medical Science Hospital, University of Tokyo.
20. Department of Gastrointestinal Medical Oncology, National Hospital Organization Shikoku Cancer Center, Matsuyama, Japan
21. Medical Center for Translational and Clinical Research, Hiroshima University, Hiroshima-shi, Hiroshima, Japan

### **Supplemental Figure legends**

Supplemental Figure 1-1 and 1-2. Plasma biomarker dynamics at baseline, day 29, and PD. Box plots indicate median, quartile, and maximum/minimum values. Ang, angiopoietin-2; HGF, hepatocyte growth factor; PlGF, placental growth factor; VEGF, vascular endothelial growth factor; OPN, osteopontin; NRP-1, neuropilin-1; IL-8, Interleukin-8; TIMP-1, tissue inhibitor of matrix metalloproteinases-1; TSP-2, thrombospondin-2; sICAM, soluble intercellular adhesion molecule; sVCAM, soluble vascular cell adhesion molecule.

**Supplemental Table 1.** Biomarker analysis, overall response rate (ORR), and disease control rate (DCR)

| Factor                           | Category | Patients (n) | ORR (%) (95% CI)   | P    | DCR (%) (95% CI)    | P    |
|----------------------------------|----------|--------------|--------------------|------|---------------------|------|
| Ang-2<br>(median: 1100 pg/mL)    | Low      | 11           | 9.1<br>(0.2–41.3)  | 1.00 | 72.7<br>(39.0–94.0) | 0.41 |
|                                  | High     | 14           | 7.1<br>(0.2–33.9)  |      | 50.0<br>(23.0–77.0) |      |
| HGF<br>(median: 160 pg/mL)       | Low      | 12           | 8.3<br>(0.2–38.5)  | 1.00 | 58.3<br>(27.7–84.8) | 1.00 |
|                                  | High     | 13           | 7.7<br>(0.2–36.0)  |      | 61.5<br>(31.6–86.1) |      |
| PlGF<br>(median: 15.5 pg/mL)     | Low      | 12           | 8.3<br>(0.2–38.5)  | 1.00 | 66.7<br>(34.9–90.1) | 0.69 |
|                                  | High     | 13           | 7.7<br>(0.2–36.0)  |      | 53.8<br>(25.1–80.8) |      |
| VEGF-D<br>(median: 192.0 pg/mL)  | Low      | 12           | 8.3<br>(0.2–38.5)  | 1.00 | 58.3<br>(27.7–84.8) | 1.00 |
|                                  | High     | 13           | 7.7<br>(0.2–36.0)  |      | 61.5<br>(31.6–86.1) |      |
| OPN<br>(median: 14000 pg/mL)     | Low      | 12           | 16.7<br>(2.1–48.4) | 0.22 | 66.7<br>(34.9–90.1) | 0.69 |
|                                  | High     | 13           | 0.0<br>(0.0–24.7)  |      | 53.8<br>(25.1–80.8) |      |
| NRP-1<br>(median: 182000 pg/mL)  | Low      | 12           | 8.3<br>(0.2–38.5)  | 1.00 | 50.0<br>(21.1–78.9) | 0.43 |
|                                  | High     | 13           | 7.7<br>(0.2–36.0)  |      | 69.2<br>(38.6–90.9) |      |
| VEGFR2<br>(median: 5320 pg/mL)   | Low      | 12           | 0.0<br>(0.0–26.5)  | 0.48 | 50.0<br>(21.1–78.9) | 0.43 |
|                                  | High     | 13           | 15.4<br>(1.9–45.4) |      | 69.2<br>(38.6–90.9) |      |
| IL-8<br>(median: 6.2 pg/mL)      | Low      | 12           | 16.7<br>(2.1–48.4) | 0.22 | 66.7<br>(34.9–90.1) | 0.69 |
|                                  | High     | 13           | 0.0<br>(0.0–24.7)  |      | 53.8<br>(25.1–80.8) |      |
| TIMP-1<br>(median: 254000 pg/mL) | Low      | 12           | 8.3<br>(0.2–38.5)  | 1.00 | 75<br>(42.8–94.5)   | 0.23 |
|                                  | High     | 13           | 7.7<br>(0.2–36.0)  |      | 46.2<br>(14.2–74.9) |      |
| TSP-2<br>(median: 5760 pg/mL)    | Low      | 12           | 8.3<br>(0.2–38.5)  | 1.00 | 50.0<br>(21.1–78.9) | 0.43 |

|                                       |      |    |                    |      |                     |      |
|---------------------------------------|------|----|--------------------|------|---------------------|------|
|                                       | High | 13 | 7.7<br>(0.2–36.0)  |      | 69.2<br>(38.6–90.9) |      |
| sICAM-1<br>(median: 269000<br>pg/mL)  | Low  | 12 | 16.7<br>(21.–48.4) | 0.22 | 58.3<br>(27.7–84.8) | 1.00 |
|                                       | High | 13 | 0.0<br>(0.0–24.7)  |      | 61.5<br>(31.6–86.1) |      |
| sVCAM-1<br>(median: 1140000<br>pg/mL) | Low  | 12 | 16.7<br>(21.–48.4) | 0.22 | 58.3<br>(27.7–84.8) | 1.00 |
|                                       | High | 13 | 0.0<br>(0.0–24.7)  |      | 61.5<br>(31.6–86.1) |      |

Ang, angiopoietin-2; HGF, hepatocyte growth factor; PlGF, placental growth factor; VEGF, vascular endothelial growth factor; OPN, osteopontin; NRP-1, neuropilin-1; IL-8, Interleukin-8; TIMP-1, tissue inhibitor of matrix metalloproteinases-1; TSP-2, thrombospondin-2; sICAM, soluble intercellular adhesion molecule; sVCAM, soluble vascular cell adhesion molecule.

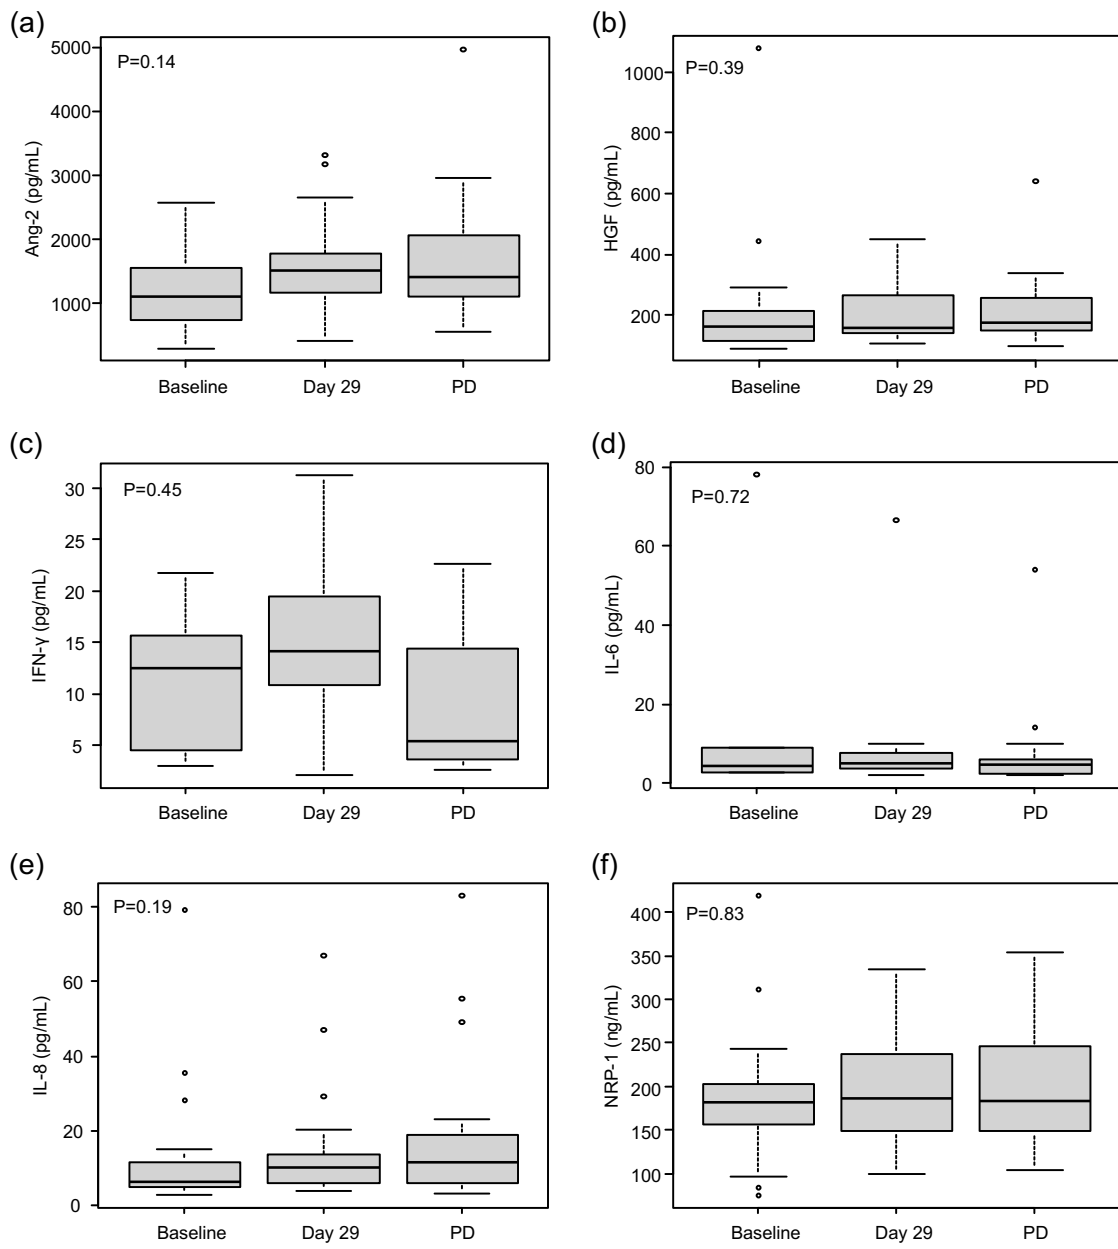

Supplemental Fig. 1-1

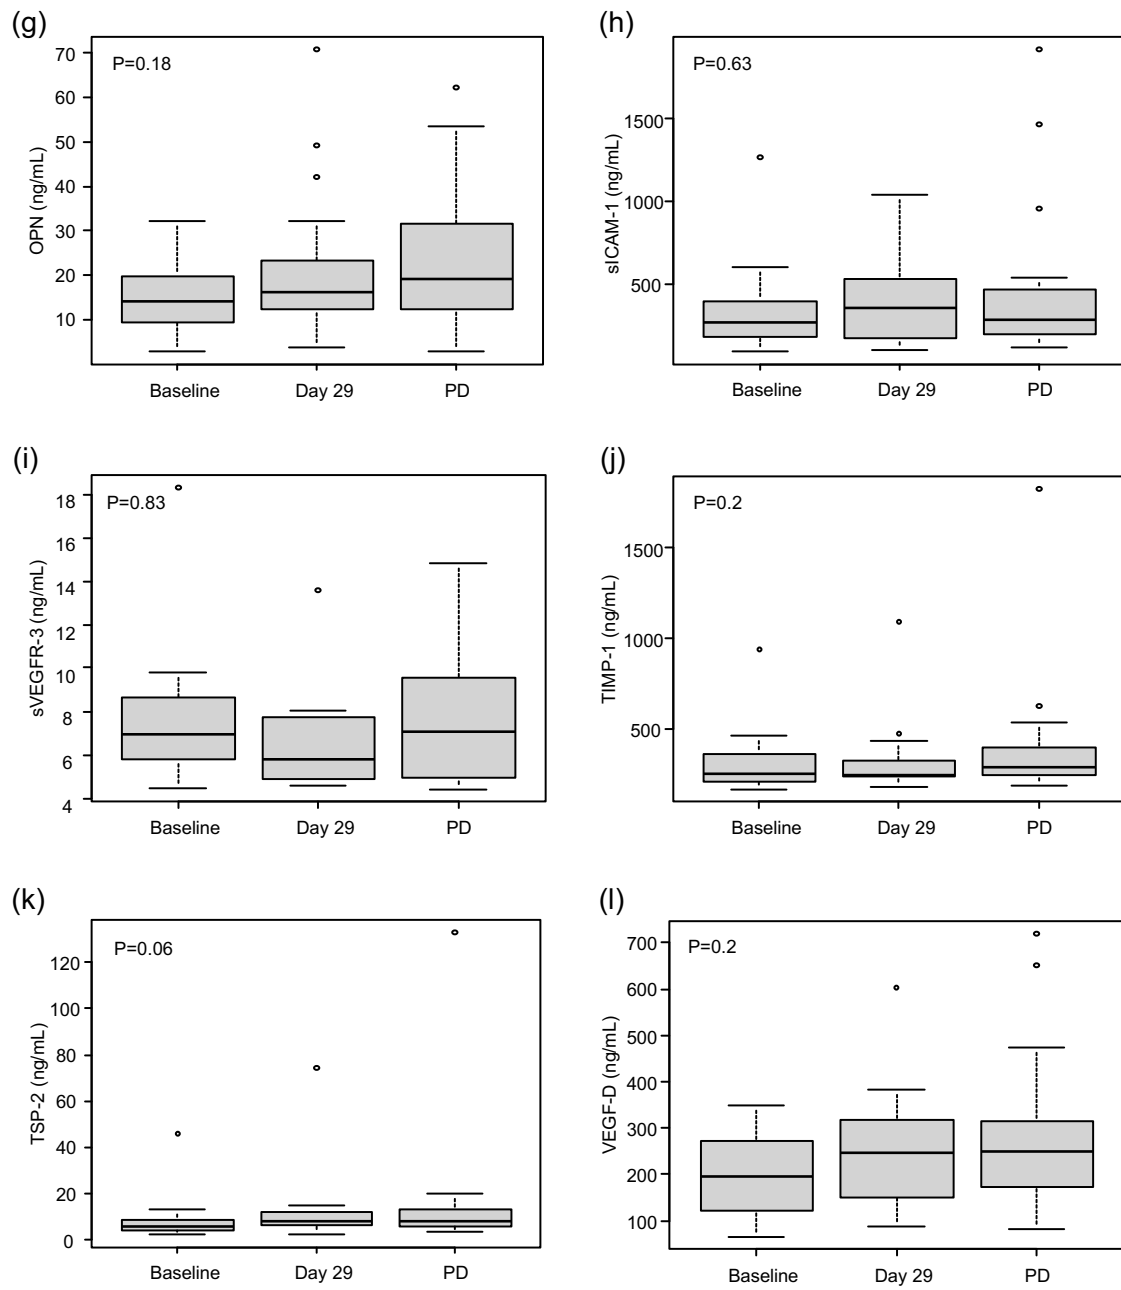

Supplemental Fig. 1-2
